1       **Mesophotic Coral Ecosystems Inside and Outside a Caribbean Marine**

2                                           **Protected Area**

3

4 Erika Gress<sup>1\*</sup>, Maria J Arroyo-Gerez<sup>1</sup>, Georgina Wright<sup>1</sup>, Dominic A Andradi-Brown<sup>1,2¶</sup>

5

6   <sup>1</sup>Conservation Leadership Programme, David Attenborough Building, Pembroke Street,  
7 Cambridge, CB2 3QZ, United Kingdom

8   <sup>2</sup>Department of Zoology, University of Oxford, John Krebs Field Station, Wytham,  
9 Oxford, Oxfordshire OX2 8QJ, United Kingdom

10  <sup>¶</sup>Present Address: Oceans Conservation, World Wildlife Fund – U.S., 1250 24th St. NW,  
11 Washington, D. C., 20037-1193. U.S.A.

12

13  \*Corresponding author: EG

14 gresserika@gmail.com

## 15 **Abstract**

16 Recent widespread shallow coral reef loss has led to calls for more holistic approaches  
17 to coral reef management, requiring inclusion of all ecosystems interacting with coral  
18 reefs in management plans. Yet almost all current reef management is biased towards  
19 shallow reefs, and overlooks that many reef species can also be found on mesophotic  
20 coral ecosystems (MCEs; reefs 30 -150 m). This study presents the first detailed  
21 quantitative characterisation of MCEs off Cozumel, in the Mexican Caribbean and  
22 provides insights into their general state. We investigate whether MCEs within the  
23 marine park have similar ecological communities to mesophotic reefs outside  
24 protection, despite widely recognised shallow reef impacts outside the protected area.  
25 Results show some taxon specific differences in MCE benthic communities between  
26 sites within the protected area and areas outside; although overall communities are  
27 similar. Regardless of protection and location, and in contrast to shallow reefs, all  
28 observed Cozumel MCEs were continuous reefs dominated by calcareous macroalgae,  
29 sponges, octocorals, and black corals. Hard corals were present on MCEs, but at low  
30 abundance. We found that 42.5 % of fish species recorded on Cozumel could be found  
31 on both shallow reefs and MCEs, including many commercially-important fish species.  
32 This suggest that MCEs may play a role in supporting fish populations. However,  
33 regardless of protection status and depth we found that large-body fishes (>500 mm)  
34 were nearly absent at all studied sites. MCEs should be incorporated into the existing  
35 shallow-reef focused management plan in Cozumel, with well informed and  
36 implemented fisheries and harvesting regulations.

37

## 38 **Introduction**

39 Coral reef ecosystems border nearly a sixth of global coastlines [1], contain  
40 thousands of species [2], and play a crucial food security role for millions of people [3].  
41 Goods and services from coral reefs have been estimated to be worth >3 billion USD  
42 annually [4]. Yet shallow coral reefs face widespread threats, both from local scale  
43 impacts (e.g. over-fishing, pollution) and from large scale impacts (e.g. coral bleaching,  
44 ocean acidification) [3,5–7]. In the face of such threats, many recent conservation  
45 efforts have focused on maintaining shallow reef resilience [8,9] combining the ability of  
46 reefs to both resist stressors and recover from damage following impact [9,10]. Yet,  
47 little consideration has been given to the role of deeper reef refuge habitats [11].  
48 Deeper light-dependent coral ecosystems, known as mesophotic coral ecosystems  
49 (MCEs), are found from approximately 30-150 m and are known to have high species  
50 diversity [12,13] including scleractinian corals, sponges, octocorals, black corals, and  
51 macroalgal species [6]. It has been suggested that MCEs may be less exposed to  
52 anthropogenic impacts than adjacent shallow reefs [6,11].

53 Ecological research on MCEs has increased recently, but MCEs remain under-studied  
54 because of technical, logistical and financial challenges associated with accessing them  
55 [7,9,11,14–16]. Studies show that upper-MCEs (30-60 m) often contain species found on  
56 shallow reefs [7,11,15,17–19], while lower-MCEs (60-150 m) may contain more deeper-  
57 water specialist species [11]. The ‘deep reef refugia hypothesis’ (DRRH) suggests that  
58 MCEs are protected from disturbances that affect shallow reef areas, such as rising  
59 water temperatures and coastal development [17,20]. In addition, mesophotic reefs  
60 are, in some cases, protected from direct fisheries exploitation [21,22], with larger  
61 individual fish recorded at near-MCE depths [21,23]. Despite this, MCEs face many  
62 similar threats to shallow reefs [24], with examples of overexploitation from targeting  
63 economically important fishes [21,25,26] and black corals [27–29] on MCEs. In addition,  
64 other processes such as sedimentation because of adjacent human development can  
65 lead to MCE habitat degradation [15].

66        There has been an increase in discussion about the relevance of MCEs [30,31] and  
67        their role in reef resilience and conservation [17]. However, the few examples of MCE  
68        management are focused on small areas and/or single taxa. Black corals  
69        (*Antipatharians*) for use in the jewellery trade [32] has led to specific harvesting  
70        regulations in Hawaii, for example [33]. Black corals are long-lived, ahermatypic corals,  
71        that are crucial habitat-forming species on some MCEs because of their complex  
72        structure and their ability to form dense beds which other fish and invertebrate species  
73        associate with [27,28,33,34]. In response to this, *Antipatharians* have been regulated by  
74        CITES Appendix II since 1981 [35].

75        There are even fewer examples of MCEs being integrated into broader reef  
76        management. A recent exception is the Coral Sea Reserve in Eilat (Gulf of Aqaba, Red  
77        Sea) where following MCE documentation, an existing marine park boundary was  
78        moved to 500 m further offshore, and to 50 m depth to incorporate MCEs into the  
79        protected area [9,17]. Other MCE areas, such as the *Oculina* reefs off the Florida coast  
80        have received direct protection through establishment of a new marine protected area  
81        after surveys indicated the damage caused by trawling in the area [24,26,36]. Even with  
82        very limited MCE data, is possible to integrate MCEs into marine protected areas. For  
83        example, on the Great Barrier Reef, MCEs became incorporated within the management  
84        plan by ensuring representation of different geological seabed features when  
85        conducting park zonation [37]. These approaches fit with the holistic view of reef  
86        management recently advocated [9,17].

87        In this study, we assess shallow reef and MCE benthic and fish communities  
88        within the Cozumel National Marine Park and adjacent areas with no protection near to  
89        the main tourism development. Shallow reefs are reported to be more degraded in the  
90        area without protection [38,39]. We investigate whether MCEs within the marine  
91        protected area (MPA) retain similar ecological communities to MCEs outside the MPA.  
92        These data will help to serve as a baseline for future studies and also provide insight into  
93        the role of these deep reefs as refuges.

94

## 95 **Methods**

### 96 **Study site**

97 Surveys were conducted around Cozumel, Mexico, an island located 16.5 km off  
98 the east coast of the Yucatan peninsula at the northern extent of the Mesoamerican  
99 Reef (Figure 1). There are extensive fringing coral reef ecosystems off the west coast of  
100 Cozumel, that are well recognized for their biological and socioeconomic importance  
101 [40,41]. They are heavily visited by recreational SCUBA divers, with reef related tourism  
102 contributing significantly to the island and the whole region's economy. In 2015, the  
103 port of Cozumel received 3.8 million passengers that arrived on 1,240 vessels – more  
104 than anywhere else in the world [42]. The reefs of Cozumel are under two protection  
105 regimes: a National Marine Park in the southwest, and the Flora and Fauna Protected  
106 Area in the north and east coasts (Figure 1). The National Marine Park was decreed in  
107 1996 and is 11,987 ha in area; it is zoned to allow only recreational SCUBA diving and  
108 other tourism (including sport fishing) in intensive use areas containing shallow coral  
109 reefs, while hook and line fishing is allowed in other less intensive use areas [43].  
110 Cozumel reefs are also now part of the most recently decreed protected area along the  
111 Mexican Caribbean that includes approximately 57,000 km<sup>2</sup> of marine habitats [42]. The  
112 Healthy Reefs Initiative (HRI), an international organization that monitors the  
113 Mesoamerican Reef has classified the shallow reefs of Cozumel contained within the  
114 National Marine Park as in 'very good' condition [44]. For Cozumel, their data shows  
115 hard coral (scleractinian) coverage at 20-40 %, and the presence of economically  
116 important species such as large groupers and snappers [44]. The Flora and Fauna  
117 protection, designated in 2012, covers the east and north coasts of the island and it has  
118 a different protection regime with only a core zone of 470 ha that is fully no-take for  
119 fisheries [45]. The majority of Cozumel reefs are contained within one of these two  
120 protection schemes, with the only area of reef without any protected status adjacent to  
121 the main development on the island (Figure 1). Here the development of vessel  
122 terminals and tourism infrastructure adjacent to the reef is known to have caused  
123 widespread shallow reef degradation [38,39,46], including declines in hard coral cover

124 from 44 % to 4 % over the period 1995-2005 [38]. Cozumel is renown for the black coral  
125 jewellery industry since the early 1960's. Antipatharian beds were widely found at  
126 upper-mesophotic depths (30-60 m), but were not properly documented prior to  
127 overexploitation [47–49].

128 Surveys were conducted at eight sites around Cozumel during August 2016. Five  
129 sites were within the Cozumel National Marine Park (MPA), and three were in an area  
130 with no protection. The MPA sites were Santa Rosa, Colombia, Punta Tunich, Palancar  
131 Jardines and Herradura, and non-MPA sites were Transito Transbordador, Purgatorio  
132 and Villa Blanca outside of the MPA (Figure 1). Full GPS locations for sites are given in  
133 Electronic Supplementary Material (ESM) 1.

134

### 135 **Reef surveys**

136

137 All surveys were conducted using open-circuit SCUBA equipment between the  
138 hours of 07:00am – 11:00am. Fish surveys were conducted using a diver-operated  
139 stereo-video system (stereo-DOV), consisting of two cameras separated by 0.8 m and  
140 with approximately 3 °convergence angle filming forward along the reef (see [50] for  
141 system overview). The stereo-DOV system records two synchronised images of reef fish,  
142 allowing accurate measurements of fish length. The stereo-DOV used two GoPro Hero 4  
143 Black cameras and a spool system with biodegradable line for measuring out each  
144 transect. Transects were 30 m in length and each separated by a 10 m interval, with four  
145 transects conducted at both 15 m (shallow) and 55 m (MCE) at each site. At the  
146 beginning of the dive the stereo-DOV operator started the cameras recording and  
147 synchronised them using a torch which was turned on and off repeatedly by the dive  
148 buddy. The cameras were then pointed downwards whilst the buddy attached the end  
149 of the biodegradable line to the reef. The stereo-DOV operator swam with the cameras  
150 down, reeling out the line, until the first marker was reached after 10 m of line. At this  
151 point the cameras were pointed forwards along the reef to record the transect. After  
152 reaching the marker indicating a further 30 m of line had been unreeled the cameras

153 were pointed back down for 10 m before starting the next transect. This was repeated  
154 over 4 transects, with all transect start and end points, and transect intervals pre-  
155 marked on the biodegradable line.

156 Benthic surveys were conducted along the same survey lines following the SVS,  
157 using a GoPro Hero 4 Black camera. A planar photo quadrat was taken at the start and  
158 then at every 2.5 m intervals along the transect giving 13 quadrats per transect. When  
159 taking quadrats, the camera was held perpendicular to the reef at approximately 0.4 m  
160 above the benthos.

161

## 162 **Video analysis**

163

164 The stereo-DOV footage was analysed using EventMeasure (v4.42, SeaGIS,  
165 Melbourne, Australia). Transects were synchronised, and all fish 2.5 m either side of the  
166 camera (5 m transect width; constrained using EventMeasure) were identified to  
167 species, or the lowest taxonomic level possible and measured from snout to the tip of  
168 caudal peduncle. From the length and species identification the biomass was estimated  
169 based on length-weight ratios from Fishbase [51], based on the equation:  $W=aL^b$  Where  
170 W is the weight, L is the length and a and b are given parameters for a specific species.

171 Photos were analysed using Coral Point Count with Excel extensions [52] to  
172 determine the percent cover of different benthic categories. Ten random points were  
173 placed on each quadrat image in CPCe, and the substrate category at each point was  
174 identified. The total number of points of each substrate category per transect was then  
175 used to calculate benthic percentage coverage for each transect. Categories were: Black  
176 Coral (Antipatharia), Hard Coral (Scleractinia), Calcareous Macroalgae, Fleishy  
177 Macroalgae, Turf Algae, Crustose Coralline Algae, Sponge, Gorgonian, Hydrozoan,  
178 Cyanobacteria, and Non-Living substrate.

179

## 180 **Data analysis**

181 To evaluate differences in percentage coverage of key benthic groups a Euclidian  
182 permutational analysis of variance (ANOVA) was used on mean percentage cover of  
183 each benthic group at each depth and site. To test for broader differences in benthic  
184 community assemblage based on depth, protection, and interactions between these  
185 factors, permutational multivariate analysis of variance (PERMANOVA) was used on  
186 Bray-Curtis dissimilarities of percentage cover of all benthic categories. To further  
187 explore differences in benthic community structure based on protection and depth a  
188 redundancy analysis was conducted using the function 'rda' in vegan [53]. This  
189 redundancy analysis was based on removing non-living substrate and standardising the  
190 percentage community composition of all living components of the community.

191 Commercially-important fish species were identified based on a fishbase [51]  
192 price category classification of moderate, high or very high fisheries value. Differences in  
193 fish species richness, biomass and commercially-important fish biomass were identified  
194 using ANOVA fitting depth and protection as factors. Residual plots were checked after  
195 model fitting to ensure model assumptions were not violated. Models were simplified to  
196 remove non-significant factors or interactions based on minimising the Akaike  
197 information criterion (AIC). To identify differences in commercially-important fish, we  
198 totalled the commercially-important species biomass by family and used permutational  
199 ANOVA to test for effects of depth and protection. We followed Langlois et al. [54] to  
200 use kernel density estimates to compare length distributions between fish surveyed  
201 within and outside the protected area. Bandwidths were selected using the Sheather-  
202 Jones selection procedure [55] within the 'dpik' function in the 'KernSmooth' package  
203 [56]. Differences in the length distributions were then tested using the permutational  
204 'sm.density.compare' function in the R package 'sm' [57].

205 All permutational ANOVAs and PERMANOVAs were fitted using the 'adonis'  
206 function in vegan [53] and run for 99999 permutations. All analysis was conducted in R  
207 [58].

208

209 **Results**



210

211 **Benthic communities**

212

213 We identified differences in benthic communities based on both protection  
214 status and depth, with the significant interaction between protection and depth  
215 indicating that the effect of protection changes based on depth (Table 1). We found  
216 greater hard coral cover on shallow reefs inside the protected area ( $8.5 \pm 2.9$  % cover;  
217 mean  $\pm$  SE) than outside ( $0.5 \pm 0.1$  %), and greater gorgonian coverage on MCEs inside  
218 the protected area ( $7.1 \pm 1.6$  %) than outside ( $1.6 \pm 0.7$  %) (Figure 2). No other  
219 significant differences were detected between percentage cover of major groups such  
220 as sponges, macroalgae and non-living substrate between areas of the same depth  
221 based on protection (Figure 2). There were major differences in benthic cover between  
222 shallow reefs and MCEs, with all surveyed Cozumel MCEs existing as continuous reef  
223 systems dominated by sponges and calcareous macroalgae (mostly *Halimeda*), with  
224 black corals present and very little of the benthos covered by non-living substrates  
225 (Figure 2B). In contrast, the shallow reefs of Cozumel were characterised by areas of  
226 reef separated by patches of sand resulting in higher non-living benthic cover (Figure  
227 2A). A full list of hard coral and black coral species identified at each depth is contained  
228 in ESM 2.

229 To further explore differences in benthic ecological communities between sites  
230 within the protected area and those outside we conducted a redundancy analysis (RDA)  
231 of the benthic coverage data after removing non-living benthic groups and recalculating  
232 percentages. In the shallows we found that two of our three sites without protection  
233 were correlated with higher sponge cover, while the other site without protection had  
234 higher gorgonian and hydroid cover (Figure 3A). The highest hard coral cover was  
235 associated with two of the protected sites, Palancar Jardines and Herradura, at  $15.7 \pm$   
236  $6.9$  % and  $14.4 \pm 2.3$  % cover respectively. While the three sites without protection had  
237 the lowest hard coral cover at  $0.6 \pm 0.6$  % (Purgatorio),  $0.2 \pm 0.2$  % (Transito  
238 Transbordador) and  $0.6 \pm 0.4$  % (Villa Blanca). On MCEs, protected sites were associated

239 with greater gorgonian, black coral and crustose coralline algae cover (Figure 3B).  
240 Interestingly, some sites which clustered close together in the RDA analysis in the  
241 shallows also did so on MCEs, for example, outside the protected area Transito  
242 Transbordador and Purgatorio, and inside the protected area Palancar Jardines and  
243 Herradura. This suggests similar environmental or anthropogenic processes may be  
244 driving benthic communities on shallow reefs and MCEs. In addition to being associated  
245 with higher hard coral cover in the shallows, both Palancar Jardines and Herradura were  
246 associated with higher hard coral cover on MCEs (Figure 3B), with Herradura having the  
247 highest hard coral coverage we observed on Cozumel MCEs at  $5.1 \pm 2.0$  %. Black corals  
248 were recorded at all five MCEs within the protected area, but only at the Purgatorio  
249 MCE outside the marine park. However, overall recorded black coral coverage was low,  
250 with  $3.0 \pm 1.2$  % at Palancar Jardines and  $2.9 \pm 2.9$  % at Santa Rosa, the two sites with  
251 the greatest coverage.

252

### 253 **Fish communities**

254

255 No difference in fish species richness was identified between shallow reefs  
256 located inside and outside the protected area or between MCEs located inside and  
257 outside the protected area (Figure 4A). However, fish species richness was greater on  
258 shallow reefs than MCEs ( $F_{1,13}=22.8$ ,  $p<0.001$ ), with a mean shallow reef fish species  
259 richness of  $12.4 \pm 0.7$  species per  $150 \text{ m}^2$  in contrast to  $7.6 \pm 0.6$  mean species richness  
260 per  $150 \text{ m}^2$  on MCEs. Overall, we recorded 80 fish species on Cozumel reefs in this  
261 study, with 39 species (48.8 %) only recorded on shallow reefs, 7 species (8.9 %) only  
262 recorded on MCEs and 34 species (42.5 %) recorded on both shallow reefs and MCEs.  
263 The full list of which species were recorded at one or both depths is available in ESM 3.

264 We detected weak effects of protection status on both overall fish biomass ( $F_{1,13}$   
265  $=5.1$ ,  $p=0.04$ ) and commercially-important fish biomass ( $F_{1,13}=5.5$ ,  $p=0.04$ ), with  
266 greater fish biomass associated with sites within the protected area on both shallow  
267 reefs and MCEs (Figure 4B, 4C). We found no significant interaction between depth and

268 protection (so removed this interaction from the model during simplification) or effect  
269 of depth (shallow vs MCE) on overall fish biomass ( $F_{1,13}=3.9$ ,  $p=0.07$ ; Figure 4B) or  
270 commercially-important fish biomass ( $F_{1,13}=2.8$ ,  $p=0.12$ ; Figure 4C). However, during  
271 model simplification for both overall fish biomass and commercially-important fish  
272 biomass we found that removing depth from the model resulted in a greater model AIC  
273 value than retaining it (Model AIC for overall fish biomass: 293.66 without depth versus  
274 291.47 with depth included; commercially-important fish biomass: 293.66 without  
275 depth versus 291.98 with depth included), suggesting that differences with depth may  
276 affect reef fish biomass.

277 To identify which fish families might be driving these patterns, and to investigate  
278 the potential depth refuges for important fisheries species, we grouped all  
279 commercially-important fish species by family and compared their biomass inside and  
280 outside the marine park, and on shallow reefs and MCEs using a permutational ANOVA  
281 (Table 2). We found no commercially-important fish families showed interactions  
282 between depth and protection, or protection effects (Table 2). Commercially-important  
283 species, comprising four fish families, biomass was affected by depth, however the  
284 effect of depth was not consistent between families. Three families showed reduced  
285 biomass on MCEs compared to the shallows, these were (percentage decline in biomass  
286 for shallow reefs vs. MCEs in parenthesis): Acanthuridae (74.9 %), Haemulidae (96.0 %)  
287 and Mullidae (100.0 %). While Pomacanthidae showed a 396.1 % increase on MCEs  
288 compared to shallow reefs.

289 We tested fish length distributions, comparing inside and outside the protected  
290 area, finding that in shallow reefs outside the protected area a greater proportion of the  
291 fish are of small (>200 mm) body length (Figure 5A). This pattern is even more extreme  
292 when considering only commercially-important species on unprotected shallow reefs,  
293 with a large peak in fish body lengths between 100-250 mm, and few individuals bigger  
294 than 300 mm (Figure 5C). While protected shallow reefs share having many fish in the  
295 100-250 mm range, there are more fish with greater body lengths in the 250-400 mm  
296 range (Figure 5C). In contrast, on MCEs there are less clear differences between fish

297 length distributions inside and outside the protected area. While there are statistically  
298 significant differences in the length distribution for all recorded MCE fish, this appears  
299 to be driven by differences in the proportion of smaller fish in the 0-100 mm length  
300 range with larger bodied fish showing similar proportions (Figure 5B). When specifically  
301 comparing commercially-important fish on MCEs, we found no difference in the fish  
302 length distributions based on protection status (Figure 5D). In general, we recorded few  
303 large fish on reefs at both depths and protection types around Cozumel, with only 10  
304 individuals >500 mm length out of the 2,599 recorded fish. These were individuals of:  
305 *Caranx latus*, *Mycteroperca bonaci*, *Ocyurus chrysurus*, *Pomacanthus arcuatus* and  
306 *Sphyraena barracuda*.

307

## 308 **Discussion**

309

310 In order to test whether MCEs act as deep reef refuges, two aspects need to be  
311 considered: (i) the extent MCEs are protected from disturbances affecting shallow reefs,  
312 and (ii) evidence that MCEs could help repopulate shallow areas following disturbance  
313 [20]. Our results show that Cozumel MCEs benthic communities appear similar between  
314 sites within the protected area and areas adjacent to large shallow reef impacts. This  
315 supports the idea that MCEs have the potential to serve as refuge for benthic species.  
316 However, we identified that most hard coral species found on shallow reefs decrease in  
317 abundance or are absent on MCEs, suggesting that MCEs may have limited ability to aid  
318 shallow reef hard coral recovery. In contrast, we found 42.5 % of fish species recorded  
319 on both shallow reefs and MCEs, including many commercially-important fish species.  
320 Our results therefore indicate that MCEs may play a role in supporting fish populations.  
321 However, regardless of protection we found few large-body fishes (>500 mm), which  
322 were nearly absent at all studied sites.

323

## 324 **Differences between inside and outside MPA for shallow reefs and MCEs**

325

326 We tested whether reefs within the MPA were similar to those outside. We  
327 found that while the MPA had higher hard coral cover for shallow reefs, the main  
328 difference between MCEs inside and outside the protected area is the higher abundance  
329 of gorgonians inside. Hard corals represent a major component of the benthic  
330 community providing structural habitat in the shallow areas. Previous research has  
331 reported large declines in shallow reef hard coral cover in the area without protection  
332 on Cozumel, including at one of our study sites Villa Blanca [38]. At Villa Blanca hard  
333 coral cover declined from 44 % in 1995 to 4 % in 2005 [38], which is more severe than  
334 declines recorded within the protected area during this time [59]. We recorded current  
335 hard coral cover at Villa Blanca at <1 % suggesting that further declines have occurred.  
336 This unprotected area is adjacent to Cozumel town with multiple cruise ships, passenger  
337 and car ferries passing over and docking adjunct to the reef daily. In addition,  
338 development of a large cruise ship terminal appears to have severely affect shallow  
339 reefs [38,39].

340 In general, reefs outside the protected area were dominated by non-living  
341 components (e.g. discarded artificial structures and sand). In contrast, we found much  
342 greater hard coral cover on shallow reefs inside the protected area ( $8.5 \pm 2.9$  % cover;  
343 mean  $\pm$  SE), this is similar to estimates from recent Cozumel reef monitoring surveys  
344 inside the protected area [59,60]. Even within the protected area however, shallow reef  
345 communities exist as a series of built up reefs separated by patches of sand, and so have  
346 a large proportion of non-living benthic cover. The percentage of non-living benthic  
347 cover was not different on shallow reefs between the MPA and areas outside, we think  
348 this maybe partly because of the areas surveyed. With more replicates/larger surveyed  
349 area it is possible that more patterns would have been detectable, and we recommend  
350 this for future studies.

351 Regardless of protection and location, all observed Cozumel MCEs were  
352 continuous reefs with the main structural habitat complexity provided by calcareous  
353 macroalgae, sponges, gorgonians, and black corals. While hard corals were present on  
354 MCEs, these were at low abundance. There was no difference between sites inside and

355 outside the MPA on any benthic community component surveyed except gorgonians.  
356 Gorgonian abundance was greater in the protected area ( $7.1 \pm 1.6$  %) than unprotected  
357 sites ( $1.6 \pm 0.7$  %). It is not clear what drives these patterns, as it has previously been  
358 suggested that gorgonians are more resilient to disturbance impacts and other  
359 environmental factors than many other reef organisms such as hard corals [61,62].  
360 However, the lack of hard corals on MCEs combined with high densities of gorgonians  
361 may mean that gorgonians are a better indicator of MCE state [12]. In this context our  
362 results would suggest that the disturbance associated with Cozumel town and the  
363 associated boats is likely to be affecting benthic communities on MCEs.

364 Biomass, on both shallow reefs and MCEs, was higher within the protected area  
365 than outside for all fish species, and also for commercially-important fish species.  
366 Despite the higher fish biomass within the protected area than outside, Cozumel  
367 shallow reef fish biomass within the protected area is considered low for the region  
368 [60]. This suggests that shallow sites outside the protected area are even more severely  
369 depleted. These shallow reef findings are further supported by the fish length  
370 distributions, showing fewer large fish on shallow reefs outside the protected area,  
371 particularly those of higher commercially-important. This contrasts with fish length  
372 distribution comparisons for MCEs, where there was no difference for commercially-  
373 important fish between sites within and outside the MPA. While this potentially  
374 suggests a depth refuge for larger fish on MCEs outside the protected area, this finding  
375 must be treated with caution. Fewer commercially-important fish were measured on  
376 MCEs than shallow reefs (157 versus 430), reducing power to discern differences based  
377 on protection on MCEs. In addition, the length distributions for commercially-important  
378 fish on MCEs comparing protection status looks very similar in shape to those shown for  
379 comparisons based on protection status on shallow reef commercially-important fish  
380 (Figure 5C-D). This suggests that further work is required to establish whether there are  
381 differences in length distributions based on protection on MCEs.

382 Regardless of protection and depth we found only 10 individual fish >500 mm  
383 length out of the 2,599 recorded fish. This suggests a general absence of large predatory

384 fish from the reefs of Cozumel, and is consistent with other studies on shallow reefs and  
385 MCEs facing fisheries pressure within the Mesoamerican Barrier Reef region. For  
386 example, surveys conducted on almost 150 Mesoamerican Barrier Reef shallow sites  
387 found that large groupers (>400 mm) were highly scarce, present in only 11% of  
388 locations [60]. While studies on MCEs on the southern Mesoamerican Barrier Reef have  
389 revealed increased fish body size on MCEs compared to shallow reefs, suggesting  
390 possible refuges, there were still limited numbers of larger predatory fish found [18].  
391 However, other studies have identified that Caribbean MCEs do appear to be acting as  
392 refuges for historically overfished large predatory species such as sharks and groupers  
393 [19,63].

394 Care must be taken when interpreting comparisons between our protected sites  
395 and our unprotected area. Unfortunately, because of the location of the National  
396 Marine Park on the south west coast and the unprotected area adjacent to Cozumel  
397 town on the west coast, it has not been possible to clearly disentangle effects of  
398 protection from a geographical gradient along the Cozumel coast. Previous research has  
399 repeatedly shown more severe declines in shallow reef condition in the area without  
400 protection than has been recorded for the protected area [38,39,60]. This decline in  
401 shallow reef health outside the protected area has been attributed to the close  
402 proximity of shoreline development and the large population impact because of  
403 Cozumel town [38,60] combined with large port developments adjacent to the reef [39].  
404 Our sites therefore exist on a gradient of increasing distance from the largest human  
405 settlement. Other processes can also be identified along this geographical gradient. For  
406 example, currents predominantly flow from south to north along the west coast of  
407 Cozumel [64]. Currents can influence water quality and correlate with both benthic and  
408 fish community structure [65,66]. However the greatest effects of currents on reef  
409 communities have been recorded in lagoons where water flow is restricted [66,67]. This  
410 suggests that while the current flowing past the reefs of Cozumel are likely to affect  
411 communities, this current gradient is unlikely to be the primary drivers of decline in for  
412 reefs in the more northern unprotected area.

413

414 **Community ecology across shallow reefs to MCEs around Cozumel**

415

416 All surveyed MCEs were located on steep slopes as extensions of the shallow  
417 reef community. This characteristic reduces the light levels available to benthic  
418 organisms rapidly with increased depth [7,12]. MCEs had lower hard coral cover than  
419 the shallows, which is consistent with previous preliminary observations of MCEs  
420 around Cozumel [61,68]. For example, Dahlgren [61] reports that hard coral dominated  
421 reefs ended at approximately 30 m in at the sites within the protected area, including  
422 two of our study sites: Colombia and Santa Rosa. While Günther [68] conducted surveys  
423 to 40 m depth and reports that the deeper slopes in the 40-50 m range of Cozumel are  
424 dominated algae with large sponges and octocorals present. They also report small  
425 isolated hard coral colonies present of mostly *H. cucullata*, *P. astreoides* and *E.*  
426 *fastigiata*. Interestingly, while quantitative data broken down by site and depth is not  
427 available from these earlier studies, our results appear to suggest that unlike shallow  
428 reefs, MCEs on Cozumel have not changed much in broad benthic composition. For  
429 example, we observed high presence of macroalgae, sponges and octocorals, as well as  
430 small colonies of *H. cucullata* present. This supports the idea that MCEs by virtue of  
431 their depth have provided some protection, and the main benthic communities that  
432 provide habitat and supports many other organisms are macroalgae, sponges,  
433 gorgonians and black corals.

434 Surprisingly we did not find a strong effect of depth on fish biomass. However,  
435 our model simplification based on AIC suggested that depth did have useful explanatory  
436 power when considering fish biomass. Decreasing fish biomass with increasing depth  
437 has been documented on the southern Mesoamerican Barrier Reef [18], and also at  
438 other locations in the Caribbean such as Curaçao [69] and Puerto Rico [19]. It is not clear  
439 why we did not observe this pattern, though while it is possible this could be caused by  
440 fisheries pressure on shallow reefs removing shallow reef fish biomass. While Figure 4  
441 does not show a significant difference in biomass based on depth, it is suggestive that



442 with greater statistical power a difference may be detectable. Recent work conducted  
443 on the Mesoamerican Barrier Reef has also suggested that stereo-DOV surveys may bias  
444 against smaller fish on MCEs compared to other fish survey techniques [24], though it is  
445 not clear whether this is through diver avoidance or reduced ability to discern fish on  
446 videos with lower levels of lighting. However, even if some smaller fish were missed on  
447 transects, these individuals will likely have lower contribution to overall fish biomass  
448 and so are unlikely to drive patterns in overall fish biomass with depth. We recommend  
449 more transects, of larger areas should be conducted in future studies to examine fish  
450 biomass patterns with depth in Cozumel reefs.

451 While we detected no overall difference in fish biomass between shallow reefs  
452 and MCEs, for several commercially-important fish species patterns were apparent.  
453 Biomass of commercially-important Acanthuridae, Haemulidae and Mullidae declined  
454 with increased depth. Patterns of decline in herbivorous fish biomass has been widely  
455 observed on MCEs in the western Atlantic [18,19,70], so declines in herbivorous  
456 Acanthuridae are not surprising. However, previous studies have identified species of  
457 Haemulidae as indicators of Caribbean MCEs [19], and Haemulidae have been observed  
458 on Mesoamerican Barrier Reef MCEs in Belize [71]. Additionally, despite only recording  
459 Mullidae on shallow reefs in our surveys, in Belize they have been observed >100 m on  
460 MCEs [71]. In contrast, commercially-important Pomacanthidae increased in biomass on  
461 MCEs, likely caused by the increased cover of sponges as many Pomacanthidae species  
462 are spongivores [72].

463 The sites furthest south (Palancar Jardines and Herradura in our study) had  
464 higher shallow hard coral cover than the other sites inside the protected area further  
465 north and unprotected sites. These furthest south sites also had the highest hard coral  
466 cover on MCEs, suggesting that factors driving these hard coral cover in the shallows  
467 may also be influencing MCEs. Both of these sites are furthest away from the main area  
468 of development on Cozumel, and the first reefs that currents pass over along the coast  
469 of Cozumel. The influence of both distance from settlement and current strength should  
470 be investigated in future studies.

471

472 **Integrating MCEs into current MPA management**

473

474 Our results highlight that MCEs contain highly developed benthic communities  
475 with many fish species previously reported on shallow reefs associated with them.  
476 While there is some evidence that they may be buffered from some of the disturbances  
477 affecting unprotected shallow reefs; our results also indicate that they contain unique  
478 benthic assemblages that can benefit from protection. When designing and  
479 implementing reef management plans, the whole reef ecosystem should be considered  
480 including MCEs [17]. Previous examples suggest that in places where coral reef  
481 management is already in place for shallow areas, incorporation of MCEs does not need  
482 to be complex [9,17].

483 Recent work has highlighted the refuge role that MCEs can play for invasive  
484 lionfish in the Caribbean [73], which in areas with shallow reef culling can still leave  
485 large lionfish abundances on MCEs [74]. On Cozumel there is widespread shallow  
486 lionfish culling by the recreational dive community and fishers, and as would be  
487 expected with sustained culling pressure we did not observe any lionfish on our shallow  
488 fish transects. We only observed two individual lionfish on our MCE transects, one at  
489 Villa Blanca and one at Herradura. Therefore, despite large lionfish refuges from culling  
490 being reported on MCEs in the southern Mesoamerican Barrier Reef [74], MCEs on the  
491 west coast of Cozumel do not appear to have a similar lionfish refuge role.

492 Overexploitation of shallow reef fisheries combined with new technology has  
493 been suggested to lead to expansion of fisheries to MCEs [21,24]. While in some areas  
494 of the Caribbean, MCEs have been highlighted as refuges for commercially-important  
495 fish species [19,69] our results do not support this view for Cozumel. In Cozumel, the  
496 low abundance and biomass of commercially-important fish has been well documented  
497 for the shallow areas since 2008 [59,60]. Yet current annual monitoring assessments in  
498 Cozumel are only conducted to a maximum depth of 15 m [59] leaving a large  
499 knowledge gap on deeper reefs. The current Cozumel management plan states that the

500 National Marine Park extends to the 100 m isobath [43]. Despite this, there is no explicit  
501 acknowledgment of MCEs in the management plan and the plan implies that reef  
502 habitat does not extend beyond 30 m depth [43]. Therefore, this study emphasises the  
503 need to better incorporate deeper reefs into protected area, including implementation  
504 of fisheries and harvesting regulations.

505

## 506 **Conclusion**

507 This study provides a first quantitative characterisation of MCEs around Cozumel,  
508 and compares them with adjacent shallow reefs and within and outside a protected  
509 area. We identified differences in benthic communities and fish communities between  
510 sites inside and outside the protected area, suggesting that MCEs can be affected by  
511 adjacent coastal development. Our study highlights the need to integrate MCEs in  
512 current reef management plans since they are a continuation of shallow coral reefs  
513 containing both unique species as well as many threatened and commercially-important  
514 shallow reef species.

515

## 516 **Acknowledgments**

517 We wish to thank Kiragu Mwangi and Stuart Paterson (Conservation Leadership  
518 Programme) for providing support and guidance through the development of this  
519 project. Additional thanks to Alex David Rogers (University of Oxford) for providing  
520 technical advice for the project, and to Cristopher Gonzalez and Blanca Quiroga  
521 (CONANP) for assisting with literature from Cozumel reefs management.

522

## 523 **Ethics**

524 This study conducted video observations of fish and benthic communities on reefs  
525 around Cozumel, Mexico. No ethical permission was required to undertake this work.

526

## 527 **Permission to carry out fieldwork**

528 Permission to carry out fieldwork was granted to EG by the Comisión Nacional de Áreas

529 Naturales Protegidas (CONANP) Dirección del Parque Nacional “Arrecifes de Cozumel”.

530 Permit number: F00.9/DPNAC/305-16 F00.9.DRPYCM.00778/2016

531

### 532 **Data Availability**

533 All raw data and R code for analysis will be made available prior to peer review.

534

### 535 **Competing Interests**

536 We have no competing interests.

537

### 538 **Authors' Contributions**

539 EG and DAAB designed the study. EG, MJAG, GW and DAAB conducted the fieldwork  
540 and video/photo analysis. DAAB conducted the statistical analysis. EG, MJAG, GW and  
541 DAAB wrote the manuscript and critically revised it. All authors gave final approval for  
542 publication.

543

### 544 **Funding Statement**

545 Funding for this study was provided by Arcadia through the Conservation Leadership  
546 Programme (coordinated by Flora and Fauna International, BirdLife International and  
547 Wildlife Conservation Society). DAAB is funded by a Fisheries Society of the British Isles  
548 PhD studentship. The funders did not have any role in the study design, data collection  
549 and analysis, decision to publish, or preparation of the manuscript.

550

551

### 552 **References**

- 553 1. UNEP-WCMC. 2010 Global distribution of warm-water coral reefs, compiled from  
554 multiple sources including the Millennium Coral Reef Mapping Project. Version  
555 1.3. *UNEP World Conserv. Monit. Cent.*
- 556 2. Roberts CM *et al.* 2002 Marine biodiversity hotspots and conservation priorities

- 557 for tropical reefs. *Science*. **295**, 1280–1284. (doi:10.1126/science.1067728)
- 558 3. Cinner J. 2014 Coral reef livelihoods. *Curr. Opin. Environ. Sustain.* **7**, 65–71.  
559 (doi:10.1016/j.cosust.2013.11.025)
- 560 4. Costanza R. 1997 The value of the world’s ecosystem services and natural capital.  
561 *Nature* **387**, 253–260. (doi:10.1038/387253a0)
- 562 5. Hughes TP *et al.* 2003 Climate change, human impacts, and the resilience of coral  
563 reefs. *Science*. **301**, 929–933. (doi:10.1126/science.1085046)
- 564 6. Hinderstein LM, Marr JCA, Martinez FA, Dowgiallo MJ, Puglise KA, Pyle RL,  
565 Zawada DG, Appeldoorn R. 2010 Theme section on ‘Mesophotic Coral  
566 Ecosystems: Characterization, Ecology, and Management’. *Coral Reefs* **29**, 247–  
567 251. (doi:10.1007/s00338-010-0614-5)
- 568 7. Lesser MP, Slattery M, Leichter JJ. 2009 Ecology of mesophotic coral reefs. *J. Exp.*  
569 *Mar. Bio. Ecol.* **375**, 1–8. (doi:10.1016/j.jembe.2009.05.009)
- 570 8. Hughes TP, Graham NAI, Jackson JBC, Mumby PJ, Steneck RS. 2010 Rising to the  
571 challenge of sustaining coral reef resilience. *Trends Ecol. Evol.* **25**, 633–642.  
572 (doi:10.1016/j.tree.2010.07.011)
- 573 9. Loya Y, Eyal G, Treibitz T, Lesser MP, Appeldoorn R. 2016 Theme section on  
574 mesophotic coral ecosystems: advances in knowledge and future perspectives.  
575 *Coral Reefs* **35**, 1–9. (doi:10.1007/s00338-016-1410-7)
- 576 10. Cote IM, Darling ES. 2010 Rethinking ecosystem resilience in the face of climate  
577 change. *PLoS Biol.* **8**, e1000438. (doi:10.1371/journal.pbio.1000438)
- 578 11. Slattery M, Lesser MP, Brazeau D, Stokes MD, Leichter JJ. 2011 Connectivity and  
579 stability of mesophotic coral reefs. *J. Exp. Mar. Bio. Ecol.* **408**, 32–41.  
580 (doi:10.1016/j.jembe.2011.07.024)
- 581 12. Baker EK, Puglise K a., Harris PT. (eds) 2016 *Mesophotic Coral Ecosystems - A*  
582 *Lifeboat for Coral Reefs? Nairobi and Arendal: The United Nations Environmental*  
583 *Programme and GRID-Arendal.*
- 584 13. Armstrong RA, Singh H, Torres J, Nemeth RS, Can A, Roman C, Eustice R, Riggs L,  
585 Garcia-Moliner G. 2006 Characterizing the deep insular shelf coral reef habitat of

- 586 the Hind Bank marine conservation district (US Virgin Islands) using the Seabed  
587 autonomous underwater vehicle. *Cont. Shelf Res.* **26**, 194–205.  
588 (doi:10.1016/j.csr.2005.10.004)
- 589 14. Bak RPM, Nieuwland G, Meesters EH. 2005 Coral reef crisis in deep and shallow  
590 reefs: 30 years of constancy and change in reefs of Curacao and Bonaire. *Coral*  
591 *Reefs* **24**, 475–479. (doi:10.1007/s00338-005-0009-1)
- 592 15. Kahng SE, Garcia-Sais JR, Spalding HL, Brokovich E, Wagner D, Weil E, Hinderstein  
593 L, Toonen RJ. 2010 Community ecology of mesophotic coral reef ecosystems.  
594 *Coral Reefs* **29**, 255–275. (doi:10.1007/s00338-010-0593-6)
- 595 16. Pyle RL. 1998 Use of advanced mixed-gas diving technology to explore the coral  
596 reef ‘Twilight Zone’. In *Ocean Pulse: A critical Diagnosis* (eds JT Tanacredi, J Loret),  
597 pp. 71–88. New York, Springer Science. (doi:10.1007/978-1-4899-0136-1)
- 598 17. Bridge TCL, Hughes TP, Guinotte JM, Bongaerts P. 2013 Call to protect coral reefs.  
599 *Nat. Clim. Chang.* **3**, 528–530. (doi:10.1038/nclimate18790)
- 600 18. Andradi-Brown DA, Gress E, Wright G, Exton DA, Rogers AD. 2016 Reef fish  
601 community biomass and trophic structure changes across shallow to upper-  
602 Mesophotic reefs in the mesoamerican barrier reef, Caribbean. *PLoS One* **11**,  
603 e0156641. (doi:10.1371/journal.pone.0156641)
- 604 19. Bejarano I, Appeldoorn RS, Nemeth M. 2014 Fishes associated with mesophotic  
605 coral ecosystems in La Parguera, Puerto Rico. *Coral Reefs* **33**, 313–328.  
606 (doi:10.1007/s00338-014-1125-6)
- 607 20. Bongaerts P, Ridgway T, Sampayo EM, Hoegh-Guldberg O. 2010 Assessing the  
608 ‘deep reef refugia’ hypothesis: Focus on Caribbean reefs. *Coral Reefs* **29**, 309–  
609 327. (doi:10.1007/s00338-009-0581-x)
- 610 21. Lindfield SJ, McIlwain JL, Harvey ES. 2014 Depth refuge and the impacts of SCUBA  
611 spearfishing on coral reef fishes. *PLoS One* **9**, e92628.  
612 (doi:10.1371/journal.pone.0092628)
- 613 22. Lindfield SJ, Harvey ES, Halford AR, McIlwain JL. 2016 Mesophotic depths as  
614 refuge areas for fishery-targeted species on coral reefs. *Coral Reefs* **35**, 125–137.

- 615 (doi:10.1007/s00338-015-1386-8)
- 616 23. Asher J, Williams ID, Harvey ES. 2017 Mesophotic Depth Gradients Impact Reef  
617 Fish Assemblage Composition and Functional Group Partitioning in the Main  
618 Hawaiian Islands. *Front. Mar. Sci.* **4**, 98. (doi:10.3389/fmars.2017.00098)
- 619 24. Andradi-Brown DA *et al.* 2016 Threats to mesophotic coral ecosystems and  
620 management options. In *Mesophotic coral ecosystems – a lifeboat for coral reefs?*  
621 (eds: Baker EK, Puglise K a., Harris PT.) p. 67-82. Nairobi and Arendal: The United  
622 Nations Environment Programme and GRID-Arendal.
- 623 25. Wood E, Sulsiansa MS, Mustapa I. 2006 Fishing practices, status of coral reef  
624 resources and tactics for reversing unsustainable use on the Semporna Island  
625 reefs (Sabah, Malaysia). *Proc. 10th Int. Coral Reef Symp.* 1211–1217.
- 626 26. Reed JK, Koenig CC, Shepard AN. 2007 Impacts of bottom trawling on a deep-  
627 water *Oculina* coral ecosystem off Florida. *Bull. Mar. Sci.* **81**, 481–496.
- 628 27. Wagner D, Luck DG, Toonen RJ. 2012 The Biology and Ecology of Black Corals  
629 (Cnidaria: Anthozoa: Hexacorallia: Antipatharia). *Adv. Mar. Biol.* **63** pp. 67–132.  
630 (doi:10.1016/B978-0-12-394282-1.00002-8)
- 631 28. Brucker AW. 2016 Advances in Management of Precious Corals to Address  
632 Unsustainable and Destructive Harvest Techniques. In *The Cnidaria, Past, Present*  
633 *and Future* (eds S Goffredo, Z Dubinsky), pp. 747–786. Cham, Switzerland:  
634 Springer International Publishing. (doi:10.1007/978-3-319-31305-46)
- 635 29. Grigg RW. 1984 Resource management of precious corals. *Mar. Ecol.* **5**, 57–74.
- 636 30. James NP, Ginsburg RN. 1979 *The seaward margin of Belize Barrier and Atoll*  
637 *reefs: morphology, sedimentology, organism distribution and late Quaternary*  
638 *history*. Oxford, London, Edinburgh, Melbourne: Special Publication Number 3 of  
639 the International Association of Sedimentologists. Published by Blackwell  
640 Scientific Publications.
- 641 31. Goreau TF, Wells JW. 1967 The shallow-water scleractinia of Jamaica: Revised list  
642 of species and their vertical distribution range. *Bull. Mar. Sci.* **17**, 442–453.
- 643 32. Grigg RW. 2001 Black coral: History of a sustainable fishery in Hawaii. *Pacific Sci.*

- 644           **55**, 291–299. (doi:10.1353/psc.2001.0022)
- 645    33.    Boland RC, Parrish F a. 2005 A Description of Fish Assemblages in the Black Coral  
646           Beds off Lahaina, Maui, Hawai'i. *Pacific Sci.* **59**, 411–420.  
647           (doi:10.1353/psc.2005.0032)
- 648    34.    Opresko DM, Sánchez JA. 2005 Caribbean shallow-water black corals (Cnidaria:  
649           Anthozoa: Antipatharia). *Caribb. J. Sci.* **41**, 492–507.
- 650    35.    CITES. 2017 Checklist of CITES Species See: <http://checklist.cites.org> (accessed on  
651           14 February 2017).
- 652    36.    Koenig CC, Shepard AN, Reed JK, Coleman FC, Brooke SD, Brusher J, Scanlon KM.  
653           2005 Habitat and Fish Populations in the Deep-Sea Fish Populations Oculina Coral  
654           Ecosystem of the Western Atlantic. *Am. Fish. Soc. Symp.* **41**, 795–805.
- 655    37.    Bridge TCL, Grech AM, Pressey RL. 2016 Factors influencing incidental  
656           representation of previously unknown conservation features in marine protected  
657           areas. *Conserv. Biol.* **30**, 154–165. (doi:10.1111/cobi.12557)
- 658    38.    Reyes-Bonilla H, Millet-Encalada M, Álvarez-Filip L. 2014 Community structure of  
659           scleractinian corals outside protected areas in Cozumel Island, Mexico. *Atoll Res.*  
660           *Bull.* **601**, 1–13. (doi:10.5479/si.00775630.601)
- 661    39.    Sorensen H. 2006 Cozumel: The Challenges of Cruise Tourism. In *Cruise Ship*  
662           *Tourism* (ed R k. Dowling), pp. 350–359. Joondalup: CAB International.
- 663    40.    Alvarez-Filip L, Gill J a., Dulvy NK. 2011 Complex reef architecture supports more  
664           small-bodied fishes and longer food chains on Caribbean reefs. *Ecosphere* **2**,  
665           art118. (doi:10.1890/ES11-00185.1)
- 666    41.    Spalding MD. 2004 *A Guide to the Coral Reefs of the Caribbean*. Berkeley:  
667           University of California Press.
- 668    42.    Diario Oficial de la Federacion. 2016 Decreto por el que se declara Area Natural  
669           Protegida, con el caracter de reserva de la biosfera, la región conocida como  
670           Caribe Mexicano. See  
671           [http://www.dof.gob.mx/nota\\_detalle.php?codigo=5464450&fecha=07/12/2016](http://www.dof.gob.mx/nota_detalle.php?codigo=5464450&fecha=07/12/2016).
- 672    43.    Diario Oficial de la Federacion. 1998 Aviso por el que se informa al publico en



- 673 general que la Secretaria de Medio Ambiente, Recursos Naturales y Pesca, ha  
674 concluido la elaboracion del Programa de Manejo del Area Natural Protegida con  
675 el caracter de Parque Marino Nacional Arrecifes de Cozumel. See:  
676 [http://www.conanp.gob.mx/que%7B\\_%7Dhacemos/pdf/programas%7B\\_%7Dmanejo/AvisoCozumel.pdf](http://www.conanp.gob.mx/que%7B_%7Dhacemos/pdf/programas%7B_%7Dmanejo/AvisoCozumel.pdf).  
677
- 678 44. Healthy Reefs Initiative. 2017 What We Do See:  
679 <http://www.healthyreefs.org/cms/what-we-do/>.
- 680 45. Diario Oficial de la Federacion. 2015 Decreto por el que se declara area natural  
681 protegida, con el caracter de Area de proteccion de flora y fauna, la porcion norte  
682 y la franja costera orienta, terrestres y marinas de la Isla de Cozumel, Municipio  
683 de Cozumel, Estado de Quintana Roo. See  
684 [http://www.conanp.gob.mx/que%7B\\_%7Dhacemos/pdf/programas%7B\\_%7Dmanejo/2015/ISLA%7B\\_%7DDDE%7B\\_%7DCOZUMEL.pdf](http://www.conanp.gob.mx/que%7B_%7Dhacemos/pdf/programas%7B_%7Dmanejo/2015/ISLA%7B_%7DDDE%7B_%7DCOZUMEL.pdf).  
685
- 686 46. Mora C. 2008 A clear human footprint in the coral reefs of the Caribbean. *Proc.*  
687 *Biol. Sci.* **275**, 767–73. (doi:10.1098/rspb.2007.1472)
- 688 47. De La Torre R. 1979 Coral Negro: Un Recurso o una Especie en Peligro. In  
689 *Proceedings of the Gulf and Caribbean Fisheries Institute*, 31, pp. 158–163.
- 690 48. Kenyon J. 1984 Black coral off Cozumel. *Sea Front.* **30**, 267–272.
- 691 49. Padilla C. 2001 El coral negro, un recurso en la profundidad. *CONABIO.*  
692 *Biodiversitas* **39**, 7–10.
- 693 50. Watson DL, Harvey ES, Fitzpatrick BM, Langlois TJ, Shedrawi G. 2010 Assessing  
694 reef fish assemblage structure: How do different stereo-video techniques  
695 compare? *Mar. Biol.* **157**, 1237–1250. (doi:10.1007/s00227-010-1404-x)
- 696 51. Froese R, Pauly D. 2015 Fish Base. 2nd ed. See [www.fishbase.org](http://www.fishbase.org).
- 697 52. Kohler KE, Gill SM. 2006 Coral Point Count with Excel extensions (CPCe): A Visual  
698 Basic program for the determination of coral and substrate coverage using  
699 random point count methodology. *Comput. Geosci.* **32**, 1259–1269.  
700 (doi:10.1016/j.cageo.2005.11.009)
- 701 53. Oksanen AJ *et al.* 2013 Vegan: Community Ecology Package [Internet] See

- 702 <http://cran.r-project.org/package=vegan>.
- 703 54. Langlois TJ, Fitzpatrick BR, Fairclough D V, Wakefield CB, Hesp SA, McLean DL,  
704 Harvey ES, Meeuwig JJ. 2012 Similarities between Line Fishing and Baited Stereo-  
705 Video Estimations of Length-Frequency: Novel Application of Kernel Density  
706 Estimates. *PLoS One* **7**, e45973. (doi:10.1371/journal.pone.0045973)
- 707 55. Sheather SJ, Jones MC. 1991 A reliable data based bandwidth selection method  
708 for kernel density estimation. *J. R. Stat. Soc. Ser. B.* **53**, 683–690.  
709 (doi:10.2307/2345597)
- 710 56. Wand M. 2013 KernSmooth: Functions for kernel smoothing for Wand {&} Jones  
711 (1995). 2nd ed. See <http://cran.r-project.org/package=KernSmooth>.
- 712 57. Bowman AW, Azzalini A. 2014 R package ‘sm’: nonparametric smoothing  
713 methods. 2nd ed. See <http://www.stats.gla.ac.uk/~adrian/sm>;  
714 [http://azzalini.stat.unipd.it/Book\\_sm](http://azzalini.stat.unipd.it/Book_sm).
- 715 58. R Core Team. 2013 R: A language and environment for statistical computing. See  
716 [R-project.org](http://R-project.org).
- 717 59. PROMOBI. 2015 Informe final del protocolo de monitoreo de arrecifes coralinos  
718 en el complejo Cozumel: P.N. arrecifes de Cozumel y A.P.F.F. Isla Cozumel.  
719 *PROMOBI*. **9.1**, 1–63.
- 720 60. Kramer P, McField M, Alvarez-Filip L, Drysdale I, Flores MR, Giro A, Pott R. 2015  
721 2015 Report Card for the Mesoamerican Reef. Healthy Reefs Initiative  
722 ([www.healthyreefs.org](http://www.healthyreefs.org)).
- 723 61. Dahlgren EJ. 1989 Gorgonian community structure and reef zonation patterns on  
724 Yucatan coral reefs. *Bull. Mar. Sci.* **45**, 678–696.
- 725 62. Lyons PJ *et al.* 2015 The effect of recreational SCUBA divers on the structural  
726 complexity and benthic assemblage of a Caribbean coral reef. *Biodivers. Conserv.*  
727 **24**, 3491–3504. (doi:10.1007/s10531-015-1009-2)
- 728 63. Andradi-Brown DA, East A. 2016 Challenges and opportunities in conducting  
729 mesophotic reef research. *Reef Encount.* **31**, 26–31.
- 730 64. Chávez G. 2003 Subinertial flows and transports in Cozumel Channel. *J. Geophys.*

- 731            *Res.* **108**, 1–11. (doi:10.1029/2002JC001456)
- 732    65.    Nuñez- Lara E, Arias-González JE. 1998 The relationship between reef fish  
733            community structure and environmental variables in the southern Mexican  
734            Caribbean. *J. Fish Biol.* **53**, 209–221. (doi:10.1111/j.1095-8649.1998.tb01028.x)
- 735    66.    McClanahan T, Karnauskas M. 2011 Relationships between benthic cover, current  
736            strength, herbivory, and a fisheries closure in Glovers Reef Atoll, Belize. *Coral*  
737            *Reefs* **30**, 9–19. (doi:10.1007/s00338-010-0690-6)
- 738    67.    Andrefouet S, Pages J, Tartinville B. 2001 Water renewal time for classification of  
739            atoll lagoons in the Tuamotu Archipelago (French Polynesia). *Coral Reefs* **20**, 399–  
740            408. (doi:10.1007/s00338-001-0190-9)
- 741    68.    Gunther A. 1990 Distribution and bathymetric zonation of shell-boring endoliths  
742            in recent reef and shelf environments: Cozumel, Yucatan (Mexico). *Facies* **22**,  
743            233–261. (doi:10.1007/BF02536953)
- 744    69.    Pinheiro HT, Goodbody-Gringley G, Jessup ME, Shepherd B, Chequer AD, Rocha  
745            LA. 2016 Upper and lower mesophotic coral reef fish communities evaluated by  
746            underwater visual censuses in two Caribbean locations. *Coral Reefs* **35**, 139–151.  
747            (doi:10.1007/s00338-015-1381-0)
- 748    70.    Leichter JJ, Stokes MD, Genovese SJ. 2008 Deep water macroalgal communities  
749            adjacent to the Florida Keys reef tract. *Mar. Ecol. Prog. Ser.* **356**, 123–138.  
750            (doi:10.3354/meps07230)
- 751    71.    Colin PL. 1974 Observation and collection of deep-reef fishes off the coasts of  
752            Jamaica and British Honduras (Belize). *Mar. Biol.* **24**, 29–38.  
753            (doi:10.1007/BF00402844)
- 754    72.    Randall JE. 1967 Food Habits of Reef Fishes of the West Indies. *Stud. Trop.*  
755            *Oceanogr.* **5**, 655–847.
- 756    73.    Andradi-Brown DA *et al.* 2016 Large-scale invasion of western Atlantic  
757            mesophotic reefs by lionfish potentially undermines culling-based management.  
758            *Biol. Invasions* **19**, 939–954. (doi:10.1007/s10530-016-1358-0)
- 759    74.    Andradi-Brown DA *et al.* In press. Depth-dependent effects of culling – do

760 mesophotic lionfish populations undermine current management? *R. Soc. Open*  
761 *Sci.*  
762

763 **Table 1.** Benthic PERMANOVA testing for differences in benthic community  
764 structure between different protection types, depths and sites, and the interactions  
765 between them.

766

| Source           | DF | Mean Square | Pseudo-F | <i>p</i> |
|------------------|----|-------------|----------|----------|
| Protection       | 1  | 0.5         | 9.8      | <0.001   |
| Depth            | 1  | 0.9         | 16.1     | <0.001   |
| Site             | 6  | 0.3         | 4.8      | <0.001   |
| Protection:Depth | 1  | 0.4         | 7.7      | <0.001   |
| Depth:Site       | 6  | 0.2         | 4.0      | <0.001   |
| Residuals        | 48 | 0.1         |          |          |
| Total            | 63 |             |          |          |

767

768

769 **Table 2.** Biomass of commercially-important fish species grouped by family from  
 770 inside and outside the marine park on shallow reefs and MCEs. Depth and  
 771 protection effects were tested using a permutational ANOVA, with significant effects  
 772 ( $p < 0.05$ ) highlighted in bold.  
 773

| Family        | Shallow reefs                        |     |                                      |     | MCEs                                 |    |                                      |     | Depth effect |                 | Protection effect |          | Depth:Protection interaction |          |
|---------------|--------------------------------------|-----|--------------------------------------|-----|--------------------------------------|----|--------------------------------------|-----|--------------|-----------------|-------------------|----------|------------------------------|----------|
|               | Inside Park                          |     | Outside Park                         |     | Inside Park                          |    | Outside Park                         |     |              |                 |                   |          |                              |          |
|               | Mean biomass (g/150 m <sup>2</sup> ) | SE  | Mean biomass (g/150 m <sup>2</sup> ) | SE  | Mean biomass (g/150 m <sup>2</sup> ) | SE | Mean biomass (g/150 m <sup>2</sup> ) | SE  | Pseudo-F     | <i>p</i>        | Pseudo-F          | <i>p</i> | Pseudo-F                     | <i>p</i> |
| Acanthuridae  | 845                                  | 249 | 1163                                 | 330 | 239                                  | 91 | 247                                  | 122 | 11.65        | <b>&lt;0.01</b> | 0.56              | 0.47     | 0.51                         | 0.49     |
| Balistidae    | 336                                  | 177 | 170                                  | 56  | 258                                  | 55 | 181                                  | 141 | 0.05         | 0.78            | 0.37              | 0.56     | 0.05                         | 0.81     |
| Carangidae    | 1083                                 | 913 | 0                                    | 0   | 61                                   | 41 | 64                                   | 39  | 1.09         | 0.38            | 0.79              | 0.44     | 0.79                         | 0.45     |
| Haemulidae    | 468                                  | 333 | 429                                  | 52  | 0                                    | 0  | 48                                   | 55  | 3.64         | <b>0.02</b>     | 0.00              | 0.09     | 0.03                         | 0.90     |
| Kyphosidae    | 51                                   | 51  | 0                                    | 0   | 0                                    | 0  | 0                                    | 0   | 0.94         | 1.00            | 0.56              | 0.56     | 0.56                         | 1.00     |
| Labridae      | 163                                  | 120 | 0                                    | 0   | 6                                    | 6  | 0                                    | 0   | 1.61         | 0.33            | 1.13              | 0.26     | 0.96                         | 0.48     |
| Lutjanidae    | 817                                  | 345 | 72                                   | 22  | 537                                  | 54 | 0                                    | 0   | 0.24         | 0.56            | 2.28              | 0.15     | 0.06                         | 0.78     |
| Malacanthidae | 10                                   | 10  | 0                                    | 0   | 0                                    | 0  | 0                                    | 0   | 0.94         | 1.00            | 0.56              | 0.56     | 0.56                         | 1.00     |
| Monacanthidae | 30                                   | 30  | 20                                   | 22  | 0                                    | 0  | 0                                    | 0   | 1.73         | 0.21            | 0.07              | 0.11     | 0.07                         | 0.98     |

|               |     |     |     |    |     |    |    |     |      |                 |      |      |      |      |
|---------------|-----|-----|-----|----|-----|----|----|-----|------|-----------------|------|------|------|------|
| Mullidae      | 0   | 0   | 18  | 2  | 0   | 0  | 0  | 0   | 2.38 | <b>&lt;0.01</b> | 3.96 | 0.5  | 3.96 | 0.05 |
| Ostracidae    | 56  | 56  | 0   | 0  | 0   | 0  | 0  | 0   | 0.94 | 1.00            | 0.56 | 0.38 | 0.56 | 1.00 |
| Pomacanthidae | 228 | 147 | 48  | 4  | 614 | 0  | 22 | 109 | 58   | <b>0.03</b>     | 0.32 | 0.58 | 1.52 | 0.24 |
| Scaridae      | 920 | 307 | 661 | 9  | 326 | 8  | 14 | 224 | 82   | 0.06            | 0.44 | 0.53 | 0.08 | 0.78 |
| Scorpaenidae  | 0   | 0   | 0   | 0  | 42  | 42 | 46 | 46  | 46   | 0.34            | 0.01 | 0.75 | 0.01 | 0.87 |
| Serranidae    | 63  | 61  | 21  | 11 | 143 | 13 | 2  | 88  | 16   | 0.71            | 0.62 | 0.57 | 0.55 | 0.70 |
| Sphyraenidae  | 590 | 590 | 0   | 0  | 0   | 0  | 0  | 0   | 0.94 | 1.00            | 0.56 | 0.37 | 0.56 | 1.00 |

774

775

776

777

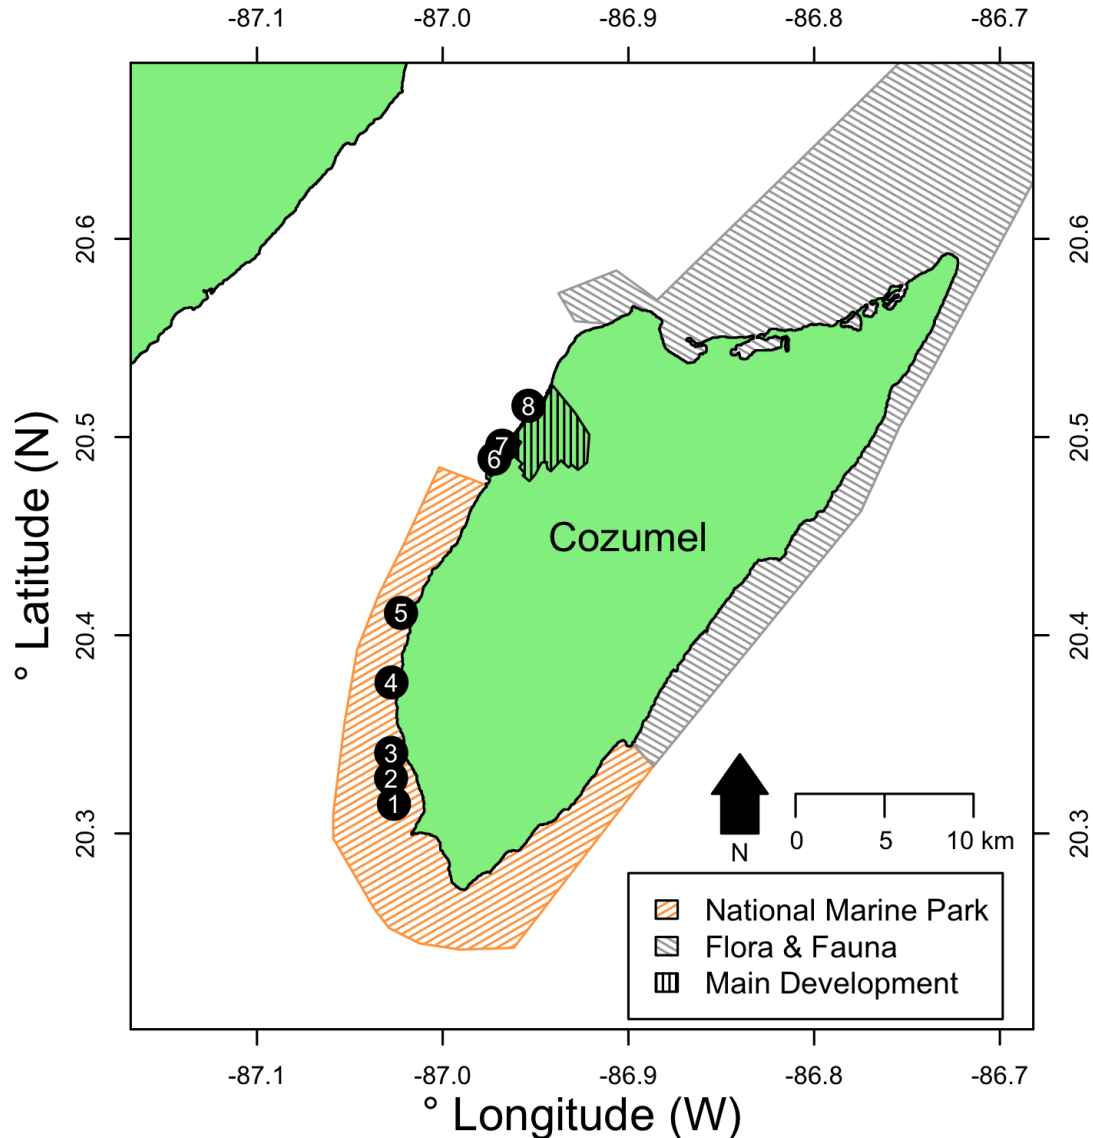

778

779

780

781

782

783

784

785

786

787

788

**Figure 1.** Location of survey sites relative to Cozumel and the National Marine Park and Flora & Fauna protected areas on Cozumel. Sites and their approximate distances from the main development in parenthesis were: 1 – Colombia (24.9 km), 2 – Herradura (23.3 km), 3 – Palancar Jardines (22.6 km), 4 – Santa Rosa (18.2 km), 5 – Punta Tunich (14.2 km), 6 – Villa Blanca (4.1 km), 7 – Transito Transbordador (3.3 km) and 8 – Purgatorio (0.6 km). All distances from the main development were measured from the passenger ferry terminal in the centre of town following the edge of the reef crest in Google Earth.



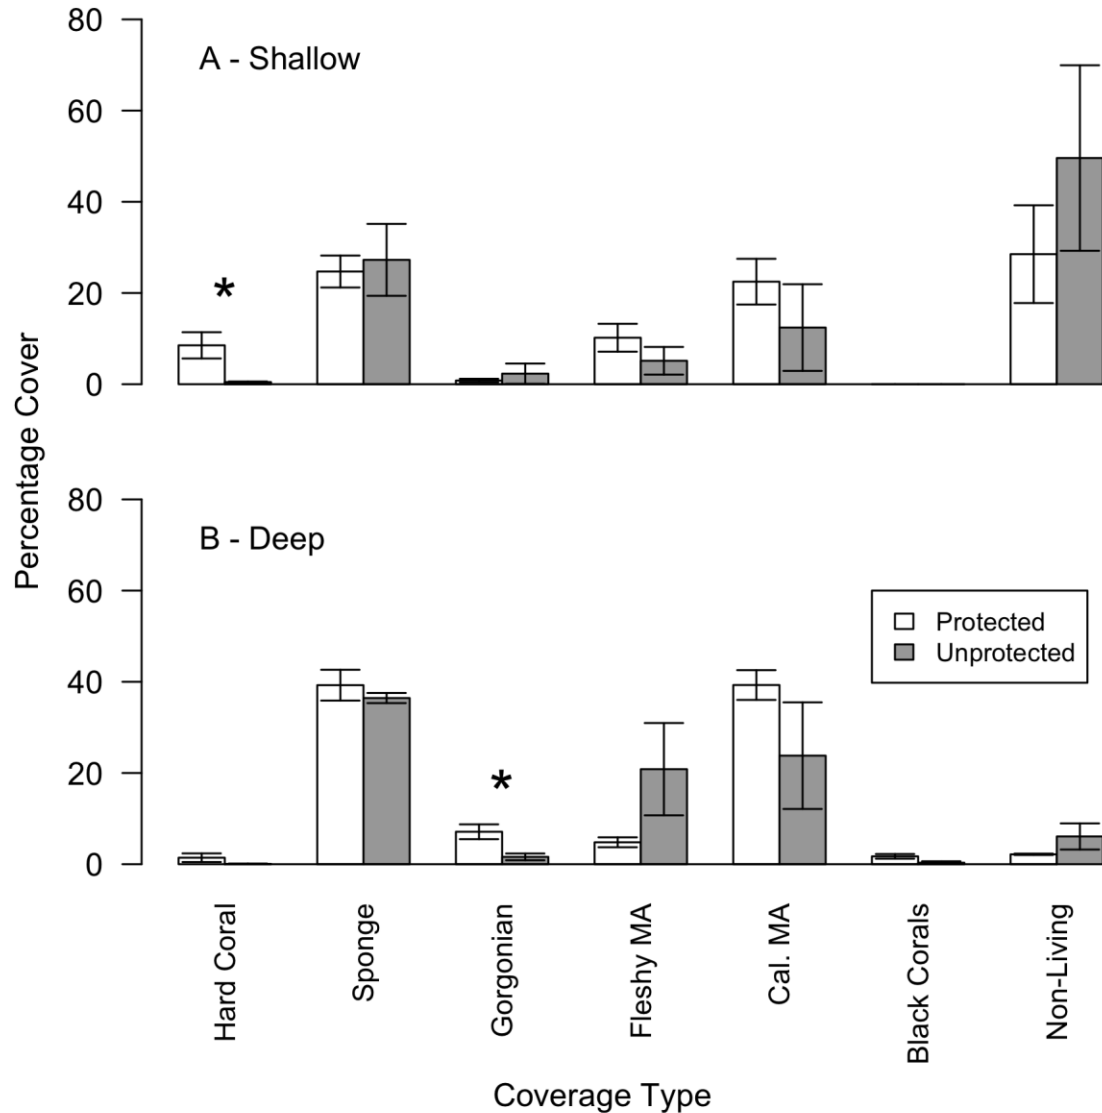

789

790

791

792

793

794

795

**Figure 2.** Percentage cover of broad benthic groups on (A) shallow reefs at 15 m and (B) MCEs at 55 m around Cozumel. Error bars represent one standard error. Significantly different coverage ( $p < 0.05$ ) between protected and unprotected areas was tested using a permutational ANOVA and indicated with a '\*'.

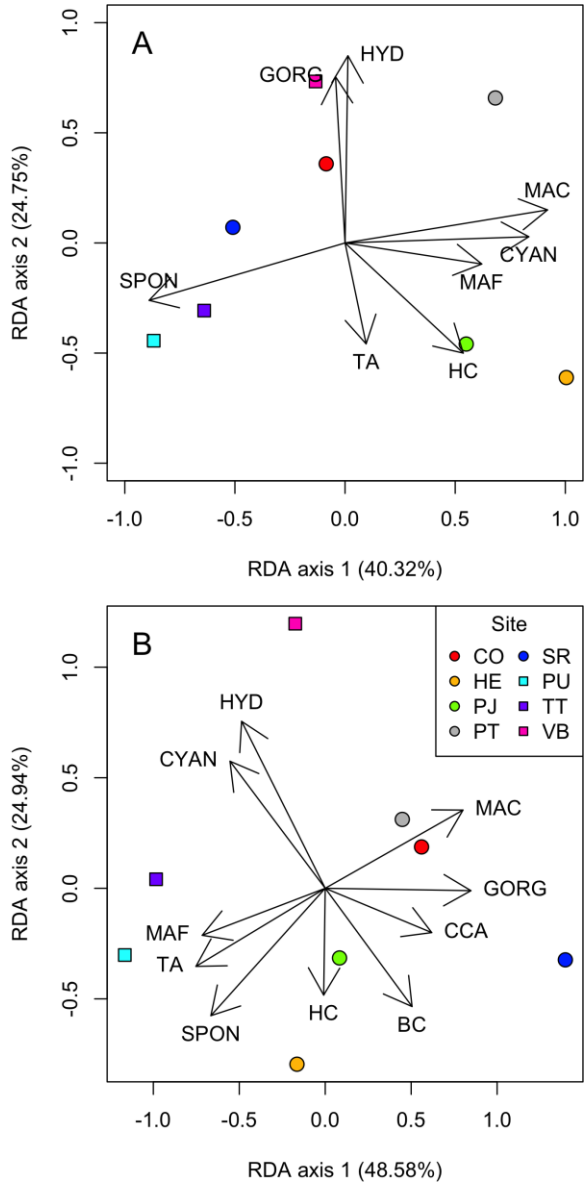

796

797

798

799

800

801

802

803

804

**Figure 3.** Redundancy analysis of the benthic coverage data standardised to remove non-living benthic cover for (A) shallow reefs at 15 m, and (B) MCEs at 55 m. Variation explained by each axis is indicated in parenthesis on the axis labels. The length and direction of the arrows corresponds to increasing cover of benthic categories at sites located in that region of the plot. Benthic categories were: BC – black coral, CCA – crustose coralline algae, CYAN – cyanobacteria, GORG – gorgonian, HC – hard coral, HYD – hydrozoan, MAC – calcareous macroalgae, MAF – fleshy macroalgae, SPON – sponge, and TA – turf algae.

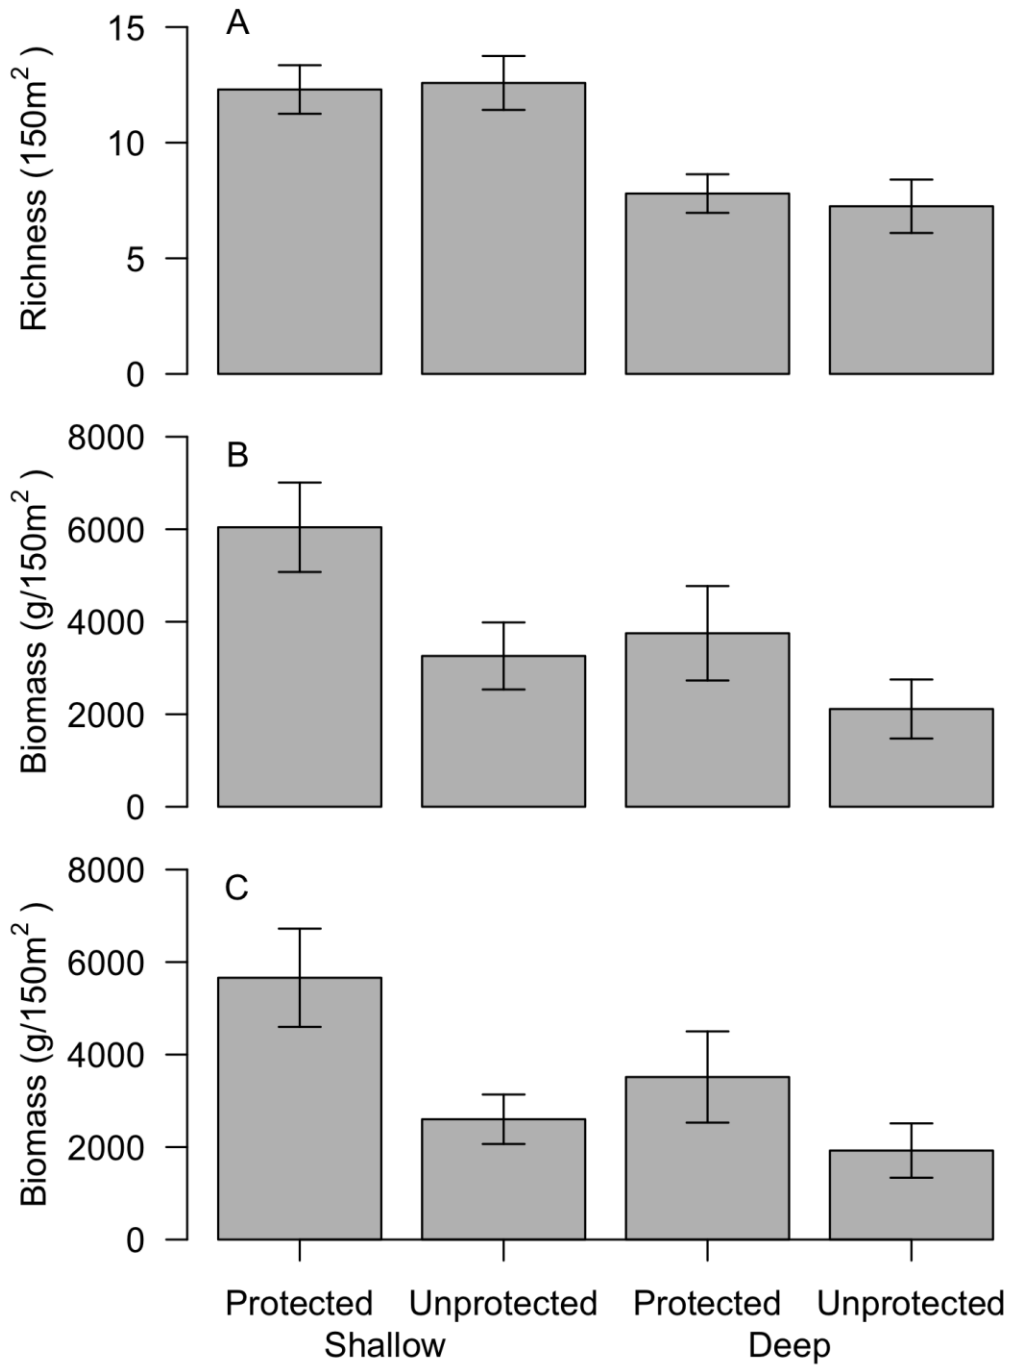

805

806

807

808

809

**Figure 4.** Comparisons of reef fish communities for shallow (15 m) and mesophotic (55 m) for (A) species richness, (B) all fish biomass, and (C) commercially-important fish biomass. Error bars indicate one standard error.

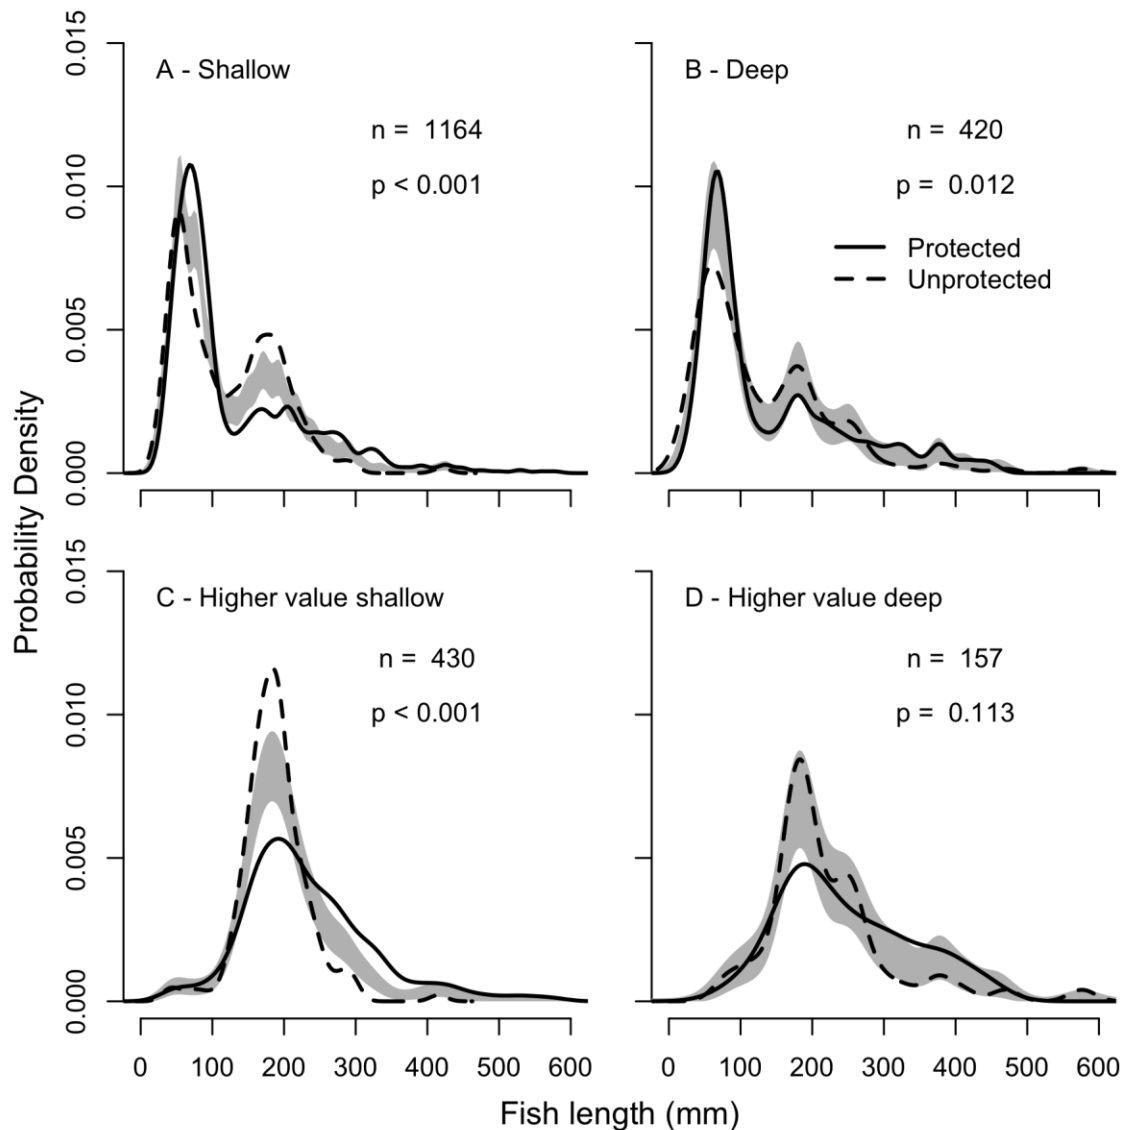

810

811

812

813

814

815

816

**Figure 5.** Fish length distributions for all fish species for (A) shallow reefs, (B) MCEs, and for commercially-important fish species only for (C) shallow reefs and (D) MCEs. The grey shaded area indicates one standard error either side of the null model of no difference in length distribution based on protection.  $n$ =number of fish.

817 **ESM 1.** Study site GPS locations. Area indicates whether within the National Marine  
818 Park (P) or in an unprotected area (N). Direction indicates whether transects were  
819 conducted following the reef depth contour broadly north (N) or south (S) from the  
820 GPS location. All GPS points given in WGS84 format.  
821

| Site                      | Area | Depth (m) | Direction | Latitude | Longitude |
|---------------------------|------|-----------|-----------|----------|-----------|
| Santa Rosa                | P    | 55        | N         | 20.37618 | 87.02757  |
| Santa Rosa                | P    | 15        | N         | 20.37913 | 87.02935  |
| Columbia                  | P    | 55        | N         | 20.31497 | 87.02625  |
| Columbia                  | P    | 15        | N         | 20.38163 | 87.02567  |
| Villablanca               | N    | 55        | N         | 20.48913 | 86.9721   |
| Villablanca               | N    | 15        | N         | 20.48637 | 86.97323  |
| Punta Tunich              | P    | 55        | N         | 20.41128 | 87.02245  |
| Punta Tunich              | P    | 15        | N         | 20.41207 | 87.02172  |
| Palancar<br>Jardins       | P    | 55        | N         | 20.33565 | 87.02773  |
| Palancar<br>Jardins       | P    | 15        | N         | 20.33697 | 87.02705  |
| Herradura                 | P    | 55        | N         | 20.3299  | 87.0278   |
| Herradura                 | P    | 15        | S         | 20.3328  | 87.02828  |
| Transito<br>Transbordador | N    | 55        | N         | 20.49565 | 86.96798  |
| Transito<br>Transbordador | N    | 15        | N         | 20.49645 | 86.9668   |
| Purgatorio                | N    | 55        | N         | 20.51578 | 86.95383  |
| Purgatorio                | N    | 15        | S         | 20.52043 | 86.94800  |

822  
823

824 **ESM 2.** Hard coral species (Scleractinia) and black coral species (Antipatharia) observed  
 825 on shallow reefs (15 m) and MCEs (55 m) at surveyed sites around Cozumel.  
 826

| Order        | Genus                | Species                 | Shallow Reef | MCE      | Authority                   |
|--------------|----------------------|-------------------------|--------------|----------|-----------------------------|
| Scleractinia |                      |                         | -            | -        |                             |
|              | <i>Diploria</i>      | <i>labyrinthiformis</i> | Observed     | -        | Linnaeus, 1758              |
|              | <i>Eusmilia</i>      | <i>fastigiata</i>       | Observed     | -        | Pallas, 1766                |
|              | <i>Helioseris</i>    | <i>cucullata</i>        | -            | Observed | Ellis & Solander, 1786      |
|              | <i>Meandrina</i>     | <i>meandrites</i>       | Observed     |          | Linnaeus, 1758              |
|              | <i>Mycetophyllia</i> | <i>aliciae</i>          | -            | Observed | Wells, 1973                 |
|              | <i>Mycetophyllia</i> | <i>lamarckiana</i>      | Observed     | -        | Milne Edwards & Haime, 1848 |
|              | <i>Orbicella</i>     | <i>annularis</i>        | Observed     | -        | Ellis & Solander, 1786      |
|              | <i>Porites</i>       | <i>astreoides</i>       | Observed     | -        | Lamarck, 1816               |
|              | <i>Porites</i>       | <i>divaricata</i>       | Observed     | -        | Le Sueur, 1820              |
|              | <i>Porites</i>       | <i>furcata</i>          | Observed     | -        | Lamarck, 1816               |
|              | <i>Porites</i>       | <i>porites</i>          | Observed     | -        | Pallas, 1766                |
|              | <i>Siderastrea</i>   | <i>siderea</i>          | Observed     | Observed | Ellis & Solander, 1768      |
|              | <i>Undaria</i>       | <i>agaricites</i>       | Observed     | Observed | Linnaeus, 1758              |
|              | <i>Undaria</i>       | <i>tenuifolia</i>       | Observed     | -        | Dana, 1848                  |
| Antipatharia |                      |                         |              |          |                             |
|              | <i>Antipathes</i>    | <i>caribbeana</i>       | -            | Observed | Opresko, 1996               |
|              | <i>Plumapathes</i>   | <i>Pennacea</i>         | -            | Observed | Pallas, 1766                |

827  
 828

829 **ESM 3.** Fish species observed on shallow reefs (15 m) and MCEs (55 m) at surveyed  
 830 sites around Cozumel.  
 831

| Family         | Genus               | Species              | Shallow Reef | MCE      | Authority               |
|----------------|---------------------|----------------------|--------------|----------|-------------------------|
| Acanthuridae   | <i>Acanthurus</i>   | <i>bahianus</i>      | Observed     | Observed | Castelnau, 1855         |
| Acanthuridae   | <i>Acanthurus</i>   | <i>chirurgus</i>     | Observed     | Observed | Bloch, 1787             |
| Acanthuridae   | <i>Acanthurus</i>   | <i>coeruleus</i>     | Observed     | Observed | Bloch & Schneider, 1801 |
| Balistidae     | <i>Balistes</i>     | <i>vetula</i>        | Observed     | Observed | Linnaeus, 1758          |
| Balistidae     | <i>Canthidermis</i> | <i>sufflamen</i>     | Observed     | -        | Mitchill, 1815          |
| Balistidae     | <i>Melichthys</i>   | <i>niger</i>         | Observed     | -        | Bloch, 1786             |
| Balistidae     | <i>Xanthichthys</i> | <i>ringens</i>       | Observed     | Observed | Linnaeus, 1758          |
| Carangidae     | <i>Caranx</i>       | <i>crysos</i>        | Observed     | Observed | Mitchill, 1815          |
| Carangidae     | <i>Caranx</i>       | <i>latus</i>         | Observed     | -        | Agassiz, 1831           |
| Carangidae     | <i>Caranx</i>       | <i>ruber</i>         | Observed     | Observed | Bloch, 1793             |
| Chaetodontidae | <i>Chaetodon</i>    | <i>capistratus</i>   | Observed     | Observed | Linnaeus, 1758          |
| Chaetodontidae | <i>Chaetodon</i>    | <i>ocellatus</i>     | Observed     | Observed | Bloch, 1787             |
| Chaetodontidae | <i>Chaetodon</i>    | <i>sedentarius</i>   | Observed     | Observed | Poey, 1860              |
| Chaetodontidae | <i>Chaetodon</i>    | <i>striatus</i>      | Observed     | Observed | Linnaeus, 1758          |
| Chaetodontidae | <i>Prognathodes</i> | <i>aculeatus</i>     | -            | Observed | Poey, 1860              |
| Grammatidae    | <i>Grama</i>        | <i>loreto</i>        | Observed     | -        | Poey, 1868              |
| Haemulidae     | <i>Anisotremus</i>  | <i>surinamensis</i>  | Observed     | -        | Bloch, 1791             |
| Haemulidae     | <i>Anisotremus</i>  | <i>virginicus</i>    | Observed     | -        | Linnaeus, 1758          |
| Haemulidae     | <i>Haemulon</i>     | <i>carbonarium</i>   | Observed     | -        | Poey, 1860              |
| Haemulidae     | <i>Haemulon</i>     | <i>flavolineatum</i> | Observed     | -        | Desmarest, 1823         |
| Haemulidae     | <i>Haemulon</i>     | <i>macrostomum</i>   | -            | Observed | Günther, 1859           |
| Haemulidae     | <i>Haemulon</i>     | <i>melanurum</i>     | Observed     | -        | Linnaeus, 1758          |
| Haemulidae     | <i>Haemulon</i>     | <i>parra</i>         | Observed     | -        | Desmarest, 1823         |
| Haemulidae     | <i>Haemulon</i>     | <i>plumierii</i>     | Observed     | Observed | Lacepède, 1801          |

|               |                        |                      |          |          |                         |
|---------------|------------------------|----------------------|----------|----------|-------------------------|
| Haemulidae    | <i>Haemulon</i>        | <i>sciurus</i>       | Observed | -        | Shaw, 1803              |
| Haemulidae    | <i>Haemulon</i>        | <i>steindachneri</i> | Observed | -        | Jordan & Gilbert, 1882  |
| Holocentridae | <i>Holocentrus</i>     | <i>adscensionis</i>  | -        | Observed | Osbeck, 1765            |
| Kyphosidae    | <i>Kyphosus</i>        | <i>sectatrix</i>     | Observed | -        | Linnaeus, 1758          |
| Labridae      | <i>Bodianus</i>        | <i>rufus</i>         | Observed | -        | Linnaeus, 1758          |
| Labridae      | <i>Clepticus</i>       | <i>parrae</i>        | Observed | -        | Bloch & Schneider, 1801 |
| Labridae      | <i>Halichoeres</i>     | <i>bivittatus</i>    | Observed | -        | Bloch, 1791             |
| Labridae      | <i>Halichoeres</i>     | <i>garnoti</i>       | Observed | Observed | Valenciennes, 1839      |
| Labridae      | <i>Halichoeres</i>     | <i>maculipinna</i>   | Observed | Observed | Müller & Troschel, 1848 |
| Labridae      | <i>Halichoeres</i>     | <i>pictus</i>        | Observed | -        | Poey, 1860              |
| Labridae      | <i>Halichoeres</i>     | <i>radiatus</i>      | -        | Observed | Linnaeus, 1758          |
| Labridae      | <i>Thalassoma</i>      | <i>bifasciatum</i>   | Observed | Observed | Bloch, 1791             |
| Lutjanidae    | <i>Lutjanus</i>        | <i>analis</i>        | Observed | -        | Cuvier, 1828            |
| Lutjanidae    | <i>Lutjanus</i>        | <i>apodus</i>        | Observed | Observed | Walbaum, 1792           |
| Lutjanidae    | <i>Lutjanus</i>        | <i>buccanella</i>    | Observed | -        | Cuvier, 1828            |
| Lutjanidae    | <i>Lutjanus</i>        | <i>griseus</i>       | Observed | -        | Linnaeus, 1758          |
| Lutjanidae    | <i>Lutjanus</i>        | <i>mahogoni</i>      | Observed | Observed | Cuvier, 1828            |
| Lutjanidae    | <i>Lutjanus</i>        | <i>synagris</i>      | Observed | -        | Linnaeus, 1758          |
| Lutjanidae    | <i>Ocyurus</i>         | <i>chrysurus</i>     | Observed | Observed | Bloch, 1791             |
| Malacanthidae | <i>Malacanthus</i>     | <i>plumieri</i>      | Observed | -        | Bloch, 1786             |
| Monacanthidae | <i>Aluterus</i>        | <i>scriptus</i>      | Observed | -        | Osbeck, 1765            |
| Monacanthidae | <i>Cantherhines</i>    | <i>pullus</i>        | Observed | -        | Ranzani, 1842           |
| Mullidae      | <i>Pseudupeneus</i>    | <i>maculatus</i>     | Observed | -        | Bloch, 1793             |
| Ostraciidae   | <i>Acanthostracion</i> | <i>polygonius</i>    | Observed | -        | Poey, 1876              |
| Pomacanthidae | <i>Holacanthus</i>     | <i>ciliaris</i>      | Observed | Observed | Linnaeus, 1758          |
| Pomacanthidae | <i>Holacanthus</i>     | <i>tricolor</i>      | Observed | Observed | Bloch, 1795             |



|                   |                            |                          |          |          |                               |
|-------------------|----------------------------|--------------------------|----------|----------|-------------------------------|
| Pomacanthid<br>ae | <i>Pomacanthus</i>         | <i>arcuatus</i>          | Observed | Observed | Linnaeus,<br>1758             |
| Pomacanthid<br>ae | <i>Pomacanthus</i>         | <i>paru</i>              | Observed | Observed | Bloch, 1787                   |
| Pomacentrid<br>ae | <i>Abudefduf</i>           | <i>saxatilis</i>         | Observed | -        | Linnaeus,<br>1758             |
| Pomacentrid<br>ae | <i>Chromis</i>             | <i>cyanea</i>            | Observed | Observed | Poey, 1860                    |
| Pomacentrid<br>ae | <i>Chromis</i>             | <i>insolata</i>          | Observed | Observed | Cuvier, 1830                  |
| Pomacentrid<br>ae | <i>Chromis</i>             | <i>multilineata</i>      | Observed | -        | Guichenot,<br>1853            |
| Pomacentrid<br>ae | <i>Microspatho<br/>don</i> | <i>chrysurus</i>         | Observed | -        | Cuvier, 1830                  |
| Pomacentrid<br>ae | <i>Stegastes</i>           | <i>adustus</i>           | Observed | Observed | Troschel,<br>1865             |
| Pomacentrid<br>ae | <i>Stegastes</i>           | <i>diencaeus</i>         | Observed | -        | Jordan &<br>Rutter, 1897      |
| Pomacentrid<br>ae | <i>Stegastes</i>           | <i>leucostictus</i>      | Observed | -        | Müller &<br>Troschel,<br>1848 |
| Pomacentrid<br>ae | <i>Stegastes</i>           | <i>partitus</i>          | Observed | Observed | Poey, 1868                    |
| Pomacentrid<br>ae | <i>Stegastes</i>           | <i>planifrons</i>        | Observed | -        | Cuvier, 1830                  |
| Pomacentrid<br>ae | <i>Stegastes</i>           | <i>variabilis</i>        | Observed | -        | Castelnau,<br>1855            |
| Scaridae          | <i>Scarus</i>              | <i>coeruleus</i>         | Observed | -        | Edwards,<br>1771              |
| Scaridae          | <i>Scarus</i>              | <i>iseri</i>             | Observed | Observed | Bloch, 1789                   |
| Scaridae          | <i>Scarus</i>              | <i>taeniopterus</i>      | Observed | -        | Lesson, 1829                  |
| Scaridae          | <i>Scarus</i>              | <i>vetula</i>            | Observed | Observed | Bloch &<br>Schneider,<br>1801 |
| Scaridae          | <i>Sparisoma</i>           | <i>aurofrenatu<br/>m</i> | Observed | Observed | Valenciennes<br>, 1840        |
| Scaridae          | <i>Sparisoma</i>           | <i>chrysopteru<br/>m</i> | Observed | Observed | Bloch &<br>Schneider,<br>1801 |
| Scaridae          | <i>Sparisoma</i>           | <i>rubripinne</i>        | Observed | Observed | Valenciennes<br>, 1840        |
| Scaridae          | <i>Sparisoma</i>           | <i>viride</i>            | Observed | Observed | Bonnaterre,<br>1788           |
| Scorpaenidae      | <i>Pterois</i>             | <i>volitans</i>          | -        | Observed | Linnaeus,<br>1758             |
| Serranidae        | <i>Cephalopholi<br/>s</i>  | <i>cruentata</i>         | -        | Observed | Lacepède,<br>1802             |

|                |                      |                     |          |          |                |
|----------------|----------------------|---------------------|----------|----------|----------------|
| Serranidae     | <i>Cephalopholis</i> | <i>fulva</i>        | Observed | Observed | Linnaeus, 1758 |
| Serranidae     | <i>Epinephelus</i>   | <i>adscensionis</i> | Observed | -        | Osbeck, 1765   |
| Serranidae     | <i>Hypoplectrus</i>  | <i>nigricans</i>    | Observed | -        | Poey, 1852     |
| Serranidae     | <i>Mycteroperca</i>  | <i>bonaci</i>       | -        | Observed | Poey, 1860     |
| Serranidae     | <i>Serranus</i>      | <i>tigrinus</i>     | Observed | -        | Bloch, 1790    |
| Sphyraenidae   | <i>Sphyraena</i>     | <i>barracuda</i>    | Observed | -        | Edwards, 1771  |
| Tetraodontidae | <i>Canthigaster</i>  | <i>rostrata</i>     | Observed | Observed | Bloch, 1786    |

832  
833  
834
